# Supplementary material
Source: PubMed Central journal article supplement (PMC3415867)
Supplement: supp_138.12.2495_Supplemental_figure_2_revision_2_Compatibility_Mode.pdf [file supp_138.12.2495_Supplemental_figure_2_revision_2_Compatibility_Mode.pdf]

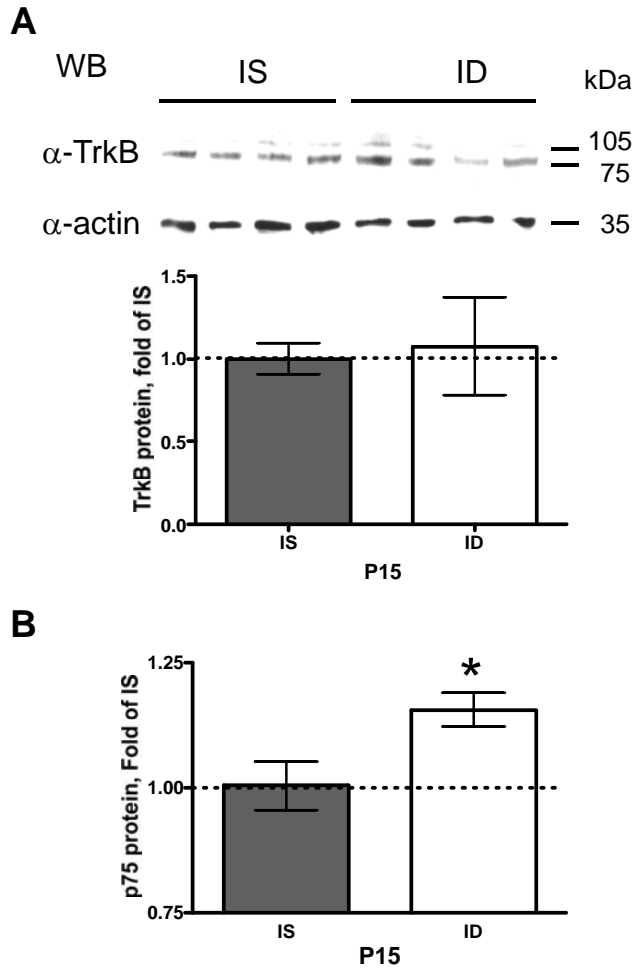

*Supplemental figure 2.* Hippocampus neurotrophic receptor protein expression in IS and ID rats at P15. A. Western blot showing TrkB protein and a corresponding plot of band intensity. B. p75<sup>NTR</sup> protein expression in P15 rat hippocampus. Values are means  $\pm$  SEM, n=4-6. \*Different from IS,  $P=0.05$ , (Mann-Whitney U-test).
